# Supplementary material for: Observed in-plume gaseous elemental mercury depletion suggests significant mercury scavenging by volcanic aerosols
Source: Royal Society of Chemistry journal article supplement (doi:10.1039/d3ea00063j), 2023-01-01
Supplement: d3ea00063j1.pdf [file d3ea00063j1.pdf]

Supplement for:

## Observed in-plume gaseous elemental mercury depletion suggests significant mercury scavenging by volcanic aerosols

*Alkuin M. Koenig et al.*

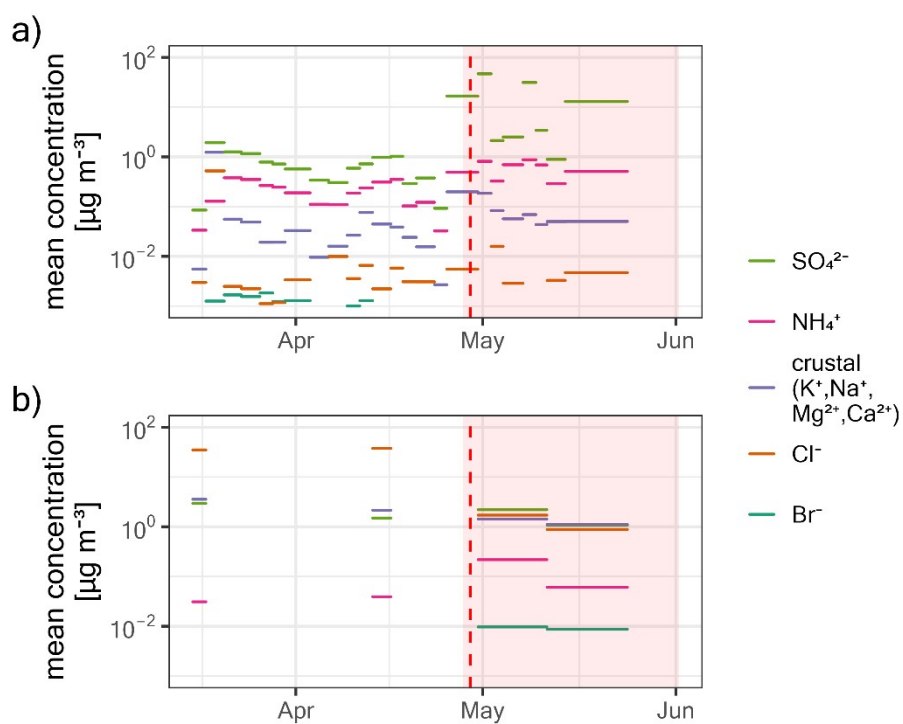

**Figure S1.** Comparison of inorganic ion concentrations in (a) submicron and (b) supermicron aerosols. All concentrations are given at STP. The dashed vertical line corresponds to the day of observed GEM depletion (April 29<sup>th</sup>). Note the data gaps for supermicron aerosols observations.

**Setup step:**

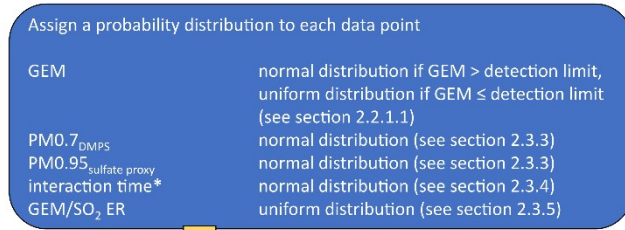

\* Only used for the calculation of rate constants

**Iterative step :**

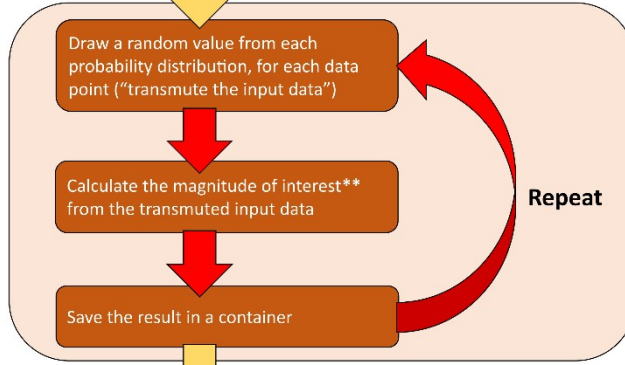

\*\* To estimate rate constants:  
Linear fit parameters following Eq.3

To estimate the amount of scavenged GEM:  
 $GEM_{no\ scavenging} - GEM_{measured}$  (see Eq.1)

After 100 000 repetitions

**Evaluation step:**

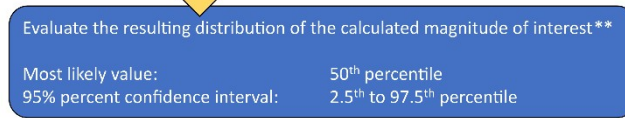

*Figure S2. Schematized representation of the procedure followed to perform the Monte Carlo simulations.*

**Table S1.** Summary of literature Hg/SO<sub>2</sub> mass ratios obtained from measurements of volcanic plume gases from hotspot/rift and arc volcanoes since the year 2000.

| Volcano                  | Location      | Tectonic setting | Hg/SO <sub>2</sub>     | Reference            |
|--------------------------|---------------|------------------|------------------------|----------------------|
| Ambrym                   | Vanuatu       | Arc              | 6.4 x 10 <sup>-6</sup> | Bagnato et al., 2011 |
| Ambrym                   | Vanuatu       | Arc              | 9.0 x 10 <sup>-6</sup> | Allard et al., 2016  |
| Yasur                    | Vanuatu       | Arc              | 1.7 x 10 <sup>-5</sup> | Bagnato et al., 2011 |
| Miyake-jima              | Japan         | Arc              | 2.4 x 10 <sup>-6</sup> | Friedli et al., 2004 |
| Miyake-jima              | Japan         | Arc              | 9.0 x 10 <sup>-6</sup> | Bagnato et al., 2011 |
| Turrialba                | Costa Rica    | Arc              | 6.0 x 10 <sup>-6</sup> | Bagnato et al., 2014 |
| Gorely                   | Alaska        | Arc              | 3.3 x 10 <sup>-6</sup> | Bagnato et al., 2011 |
| La Soufrière             | Saint Vincent | Arc              | 1.2 x 10 <sup>-5</sup> | Bagnato et al., 2011 |
| Popocatepetl             | Mexico        | Arc              | 2.0 x 10 <sup>-4</sup> | Schiavo et al., 2020 |
| Stromboli                | Italy         | Arc              | 4.7 x 10 <sup>-6</sup> | Bagnato et al., 2011 |
| Etna, Stromboli, Vulcano | Italy         | Composite, Arc   | 1.5 x 10 <sup>-7</sup> | Ferrara et al., 2000 |
| Etna                     | Italy         | Composite        | 8.8 x 10 <sup>-6</sup> | Bagnato et al., 2007 |
| Etna                     | Italy         | Composite        | 5.2 x 10 <sup>-6</sup> | Bagnato et al., 2014 |
| Nyiragongo               | DRC           | Hotspot/rift     | 5.5 x 10 <sup>-6</sup> | Bagnato et al., 2011 |
| Kīlauea                  | Hawai'i       | Hotspot/rift     | 1.0 x 10 <sup>-6</sup> | Mather et al., 2012  |
| Erebus                   | Antarctica    | Hotspot/rift     | 2.0 x 10 <sup>-5</sup> | Wardell et al., 2008 |
| Fagradalsfjall           | Iceland       | Hotspot/rift     | 6.7 x 10 <sup>-7</sup> | Edwards et al., 2021 |

**Table S2.** Overview statistics of reported Hg/SO<sub>2</sub> emission ratios since the year 2000 (see Table S1).

| Statistic                              | Hg/SO <sub>2</sub> emission ratio (mass ratio) |
|----------------------------------------|------------------------------------------------|
| 0 <sup>th</sup> percentile (minimum)   | 1.5 x 10 <sup>-7</sup>                         |
| 10 <sup>th</sup> percentile            | 8.4 x 10 <sup>-7</sup>                         |
| 50 <sup>th</sup> percentile (median)   | 5.4 x 10 <sup>-6</sup>                         |
| 90 <sup>th</sup> percentile            | 1.6 x 10 <sup>-5</sup>                         |
| 100 <sup>th</sup> percentile (maximum) | 2.0 x 10 <sup>-4</sup>                         |

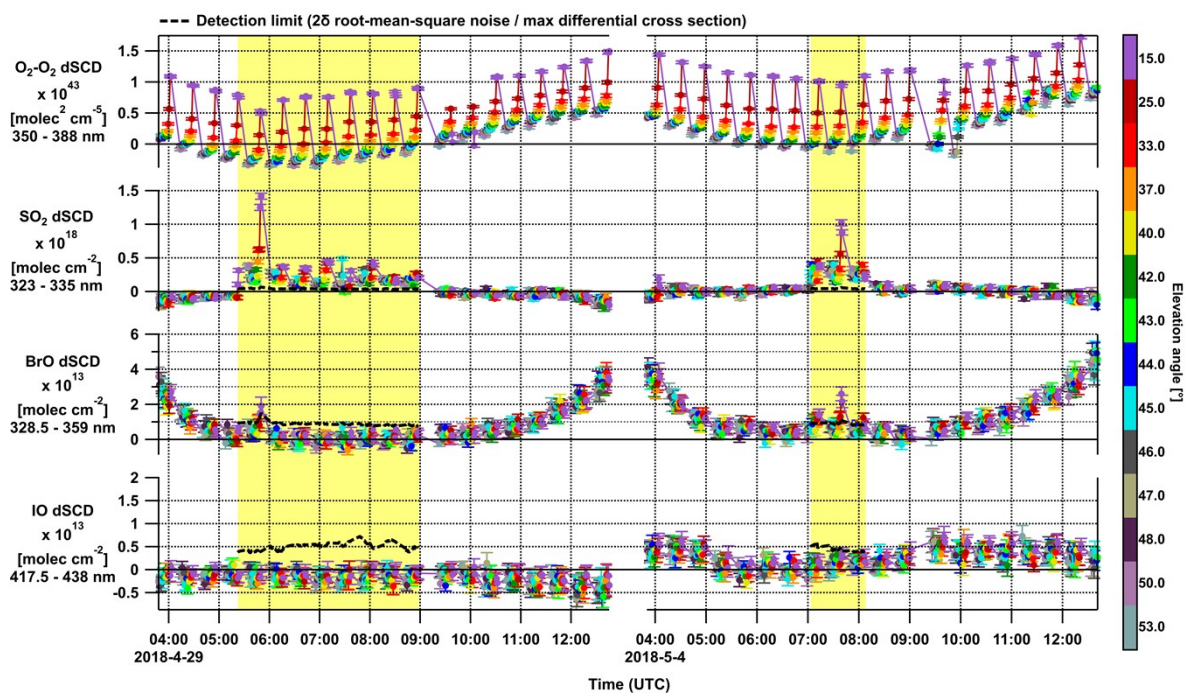

**Figure S3.**  $\text{O}_2\text{-O}_2$ ,  $\text{SO}_2$ , BrO, and IO dSCDs measured by the CU MAX-DOAS instrument on April 29 and May 4, 2018. The marker colors indicate the individual elevation angles (above the horizon). The yellow shading indicates periods of elevated  $\text{SO}_2$  dSCDs due to the volcanic plume. The black dashed lines indicate the detection limits during the volcanic plume periods. The diurnal curvature of the BrO dSCDs is due to stratospheric BrO.

**Table S3.** Estimation of GEM lifetime against oxidation by Br in daytime plumes from Piton de la Fournaise. Rate constants from (Shah et al., 2021)

| Reactions                                      |               |                                                     | comment                                                                     |
|------------------------------------------------|---------------|-----------------------------------------------------|-----------------------------------------------------------------------------|
| Reactants                                      | Products      | rate constant                                       |                                                                             |
| Br + GEM                                       | Br.GEM        | k1                                                  | thermal decomposition; k0/Keq;<br>Keq = $9.14 \times 10^{-24} \exp(7801/T)$ |
| Br.GEM                                         | Br + GEM      | k-1                                                 |                                                                             |
| Br.GEM + O3                                    | Br.GEM.O + O2 | k2                                                  |                                                                             |
| <b>Input magnitudes</b>                        |               |                                                     | Assuming 1 ppmv SO2,<br>BrO/SO2 = 1.2e-5 (measured),<br>and Br/BrO = 0.1    |
| <b>Magnitude</b>                               | <b>value</b>  | <b>unit</b>                                         |                                                                             |
| O3                                             | 40            | ppbv                                                |                                                                             |
| Br                                             | 1.2           | pptv                                                |                                                                             |
| Temperature                                    | 288           | K                                                   |                                                                             |
| Pressure                                       | 0.8           | atm                                                 |                                                                             |
| Transport time                                 | 3             | hrs                                                 |                                                                             |
| <b>Calculated magnitudes</b>                   |               |                                                     |                                                                             |
| <b>Magnitude</b>                               | <b>value</b>  | <b>unit</b>                                         |                                                                             |
| M                                              | 2.03E+19      | molec cm <sup>-3</sup>                              |                                                                             |
| k1                                             | 3.16E-13      | cm <sup>3</sup> molec <sup>-1</sup> s <sup>-1</sup> |                                                                             |
| k1*[Br]                                        | 7.71E-06      | s <sup>-1</sup>                                     |                                                                             |
| tau_GEM                                        | 3.60E+01      | hrs                                                 |                                                                             |
| k-1                                            | 5.96E-02      | s <sup>-1</sup>                                     |                                                                             |
| tau_decomp                                     | 1.68E+01      | s                                                   |                                                                             |
| k2                                             | 3.00E-11      |                                                     |                                                                             |
| k2*[O3]                                        | 2.44E+01      | s <sup>-1</sup>                                     |                                                                             |
| tau_HgII                                       | 4.10E-02      | s                                                   |                                                                             |
| <b>Output:</b>                                 |               |                                                     |                                                                             |
| GEM lifetime in plume:                         | 35.9          | hrs                                                 |                                                                             |
| GEM oxidation after 5 hours (light conditions) | ~13.0         | %                                                   |                                                                             |

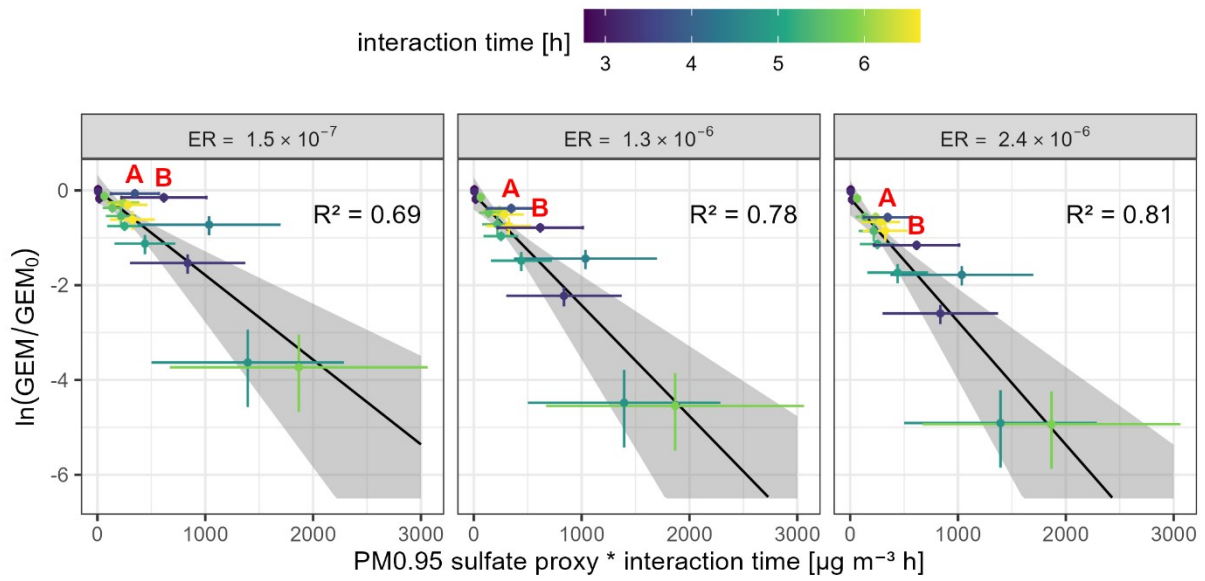

**Figure S4.** Observed GEM depletion in function of  $\text{PM}_{0.95_{\text{sulfate proxy}}}$  and interaction time, and for three different possible GEM/SO<sub>2</sub> emission ratios from Piton de la Fournaise (corresponding to the minimum, median, and maximum of the uniform probability distribution assigned to the GEM/SO<sub>2</sub> emission ratio). The error bars indicate 95% confidence intervals and the shaded area shows the 95% confidence interval of the fit (Monte Carlo simulation). The color scale shows the estimated mean interaction time between volcanic particles and GEM before the plume's arrival at Maïdo. The figure and the linear regressions are based on all observations between 3:55 and 10:10 local time. Data points marked with "A" and "B" correspond to the most notable outliers, sampled between 5:10 - 5:25 and 5:40 - 5:55 local time, respectively. Fit parameters are shown in Figure 5 of the main text.

## References:

- Allard, P., Aiuppa, A., Bani, P., Métrich, N., Bertagnini, A., Gauthier, P.-J., Shinohara, H., Sawyer, G., Parello, F., Bagnato, E., Pelletier, B., and Garaebiti, E.: Prodigious emission rates and magma degassing budget of major, trace and radioactive volatile species from Ambrym basaltic volcano, Vanuatu island Arc, *Journal of Volcanology and Geothermal Research*, 322, 119–143, <https://doi.org/10.1016/j.jvolgeores.2015.10.004>, 2016.
- Bagnato, E., Aiuppa, A., Parello, F., Calabrese, S., D'Alessandro, W., Mather, T. A., McGonigle, A. J. S., Pyle, D. M., and Wängberg, I.: Degassing of gaseous (elemental and reactive) and particulate mercury from Mount Etna volcano (Southern Italy), *Atmospheric Environment*, 41, 7377–7388, <https://doi.org/10.1016/j.atmosenv.2007.05.060>, 2007.
- Bagnato, E., Aiuppa, A., Parello, F., Allard, P., Shinohara, H., Liuzzo, M., and Giudice, G.: New clues on the contribution of Earth's volcanism to the global mercury cycle, *Bull Volcanol*, 73, 497–510, <https://doi.org/10.1007/s00445-010-0419-y>, 2011.
- Bagnato, E., Tamburello, G., Avard, G., Martinez-Cruz, M., Enrico, M., Fu, X., Sprovieri, M., and Sonke, J. E.: Mercury fluxes from volcanic and geothermal sources: an update, *Geological Society, London, Special Publications*, 410, 263–285, <https://doi.org/10.1144/SP410.2>, 2014.
- Edwards, B. A., Pfeffer, M., Ilyinskaya, E., Aiuppa, A., Outridge, P., and Wang, F.: Mercury Emissions from the 2021 Fagradalsfjall Fissure Eruption, Iceland, AGU Fall meeting, 2021, V25B-0100, 2021.
- Ferrara, R., Mazzolai, B., Lanzillotta, E., Nucaro, E., and Pirrone, N.: Volcanoes as emission sources of atmospheric mercury in the Mediterranean basin, *Science of The Total Environment*, 259, 115–121, [https://doi.org/10.1016/S0048-9697\(00\)00558-1](https://doi.org/10.1016/S0048-9697(00)00558-1), 2000.
- Friedli, H. R., Radke, L. F., Prescott, R., Pan, L., Woo, J.-H., and Carmichael, G. R.: Mercury in the atmosphere around Japan, Korea, and China as observed during the 2001 ACE-Asia field campaign: Measurements, distributions, sources, and implications, *J. Geophys. Res.*, 109, D19S25, <https://doi.org/10.1029/2003JD004244>, 2004.
- Mather, T. A., Witt, M. L. I., Pyle, D. M., Quayle, B. M., Aiuppa, A., Bagnato, E., Martin, R. S., Sims, K. W. W., Edmonds, M., Sutton, A. J., and Ilyinskaya, E.: Halogens and trace metal emissions from the ongoing 2008 summit eruption of Kīlauea volcano, Hawai'i, *Geochimica et Cosmochimica Acta*, 83, 292–323, <https://doi.org/10.1016/j.gca.2011.11.029>, 2012.
- Schiavo, B., Morton-Bermea, O., Salgado-Martinez, E., Arellano, J., and Hernández-Álvarez, E.: Estimates of mercury flux and temporal variability of Hg/SO<sub>2</sub> ratio in the plume of Popocatepetl volcano (Mexico), *Journal of South American Earth Sciences*, 101, 102614, <https://doi.org/10.1016/j.jsames.2020.102614>, 2020.
- Shah, V., Jacob, D. J., Thackray, C. P., Wang, X., Sunderland, E. M., Dibble, T. S., Saiz-Lopez, A., Černušák, I., Kellö, V., Castro, P. J., Wu, R., and Wang, C.: Improved Mechanistic Model of the Atmospheric Redox Chemistry of Mercury, *Environ. Sci. Technol.*, *acs.est.1c03160*, <https://doi.org/10.1021/acs.est.1c03160>, 2021.
- Wardell, L. J., Kyle, P. R., and Counce, D.: Volcanic emissions of metals and halogens from White Island (New Zealand) and Erebus volcano (Antarctica) determined with chemical traps, *Journal of Volcanology and Geothermal Research*, 177, 734–742, <https://doi.org/10.1016/j.jvolgeores.2007.07.007>, 2008.
